# Wide and Deep Learning for Automatic Cell Type Identification

Christopher M. Wilson<sup>1</sup>, Brooke L. Fridley<sup>1</sup>, José Conejo-Garcia<sup>2</sup>, Xuefeng Wang<sup>1,\*</sup>,  
Xiaoqing Yu<sup>1,\*</sup>,

**1 Department of Biostatistics and Bioinformatics,  
H. Lee Moffitt Cancer Center & Research Institute, Tampa, FL 33612,  
USA**

**2 Department of Immunology, H. Lee Moffitt Cancer Center & Research  
Institute, Tampa, FL 33612 Tampa, FL 33612, US**

\* [xuefeng.wang@moffitt.org](mailto:xuefeng.wang@moffitt.org), [xiaoqing.yu@moffitt.org](mailto:xiaoqing.yu@moffitt.org)

## Abstract

1 Cell type classification is an important problem in cancer research, especially with the  
2 advent of single cell technologies. Correctly identifying cells within the tumor  
3 microenvironment can provide oncologists with a snapshot of how a patient's immune  
4 system is reacting to the tumor. Wide deep learning (WDL) is an approach to construct  
5 a cell-classification prediction model that can learn patterns within high-dimensional  
6 data (deep) and ensure that biologically relevant features (wide) remain in the final  
7 model. In this paper, we demonstrate that the use of regularization can prevent  
8 overfitting and adding a wide component to a neural network can result in a model with  
9 better predictive performance. In particular, we observed that a combination of dropout  
10 and  $\ell_2$  regularization can lead to a validation loss function that does not depend on the  
11 number of training iterations and does not experience a significant decrease in  
12 prediction accuracy compared to models with  $\ell_1$ , dropout, or no regularization.  
13 Additionally, we show WDL can have superior classification accuracy when the training  
14 and testing of a model is completed data on that arise from the same cancer type, but  
15 from different platforms. More specifically, WDL compared to traditional deep learning  
16 models can substantially increase the overall cell type prediction accuracy (41 to 90%)  
17 and T-cell sub-types (CD4: 0 to 76%, and CD8: 61 to 96%) when the models were  
18 trained using melanoma data obtained from the 10X platform and tested on basal cell  
19 carcinoma data obtained using SMART-seq.

## 20 1 Introduction

21 Immunology is quickly becoming a popular area of study in cancer research and offers  
22 an opportunity to expand our understanding and ability to treat patients. Estimating  
23 the immune composition of an individual's tumor has been the focus of several studies  
24 which have developed deconvolution methods [17, 24] to estimate the cellular  
25 composition of the tumor micro-environment with bulk RNA expression data. Recently  
26 with the advent of single cell sequencing researchers are now able to measure gene  
27 expression in individual cells within the tumor-microenvironment and classify cells using  
28 hierarchical clustering and correlation-based methods [1, 2, 7]. Cell type classification

29 can be conducted by constructing visualizations such as t-Distributed Stochastic  
30 Neighbor Embedding (t-SNE) [28] or Uniform Manifold Approximation and Projection  
31 (UMAP) [16] plots to define clusters and assign these clusters to different cell types  
32 based on enriched canonical markers. However, a major drawback of this canonical  
33 process is that it heavily relies on the researchers' knowledge on the cell-type-specific  
34 signature genes, and it can become arbitrary when making conclusions based on only a  
35 handful of genes. Also, the cell type marker genes are cancer type-specific and may not  
36 generalize to other datasets [31]. In addition, discriminating between fine immune cell  
37 sub-types, such as exhausted CD8 T cells vs. activated CD8 T cells, effector CD4 T  
38 cells vs. naive CD4 T cells is a much more challenging task due to the lack of universal  
39 marker genes.

40 Identification of highly specific cell types is now possible with the development of  
41 single cell RNA-sequencing technology. However, a challenge in cell annotation in single  
42 cell RNA-sequencing is that transcription profiles are difficult to transfer between  
43 different platforms. Multiple platforms have been developed for single cell  
44 RNA-sequencing including SMART-seq [18], CEL-seq [11], Fluidigm C1 [13],  
45 SMART-seq2 [19], and more advanced droplet-based platforms including Drop-seq [15]  
46 and 10X Genomics Chromium system [35], etc. The two most commonly used platforms  
47 are SMART-seq/SMART-seq2 and 10X. The 10X platform is a droplet-based approach  
48 which generates a unique molecular identifier (UMI) at 5' or 3' ends to diminish the  
49 sequencing reads representation biases due to library amplification. On the other hand,  
50 SMART-seq and SMART-seq2 are designed to generate full-length cDNA.  
51 Droplet-based 5' or 3'-tag methods like 10X can capture much more cells which in turns  
52 can give better overview of the heterogeneity within population; while a full-length  
53 proposal like SMART-seq is better suited for studies concerned with isoforms, splicing  
54 or gene fusion. Due to the differences in how they amplify the mRNA transcripts, the  
55 data generated from these platforms are not directly comparable, which presents great  
56 challenge to the integrated cell type identification in cross-platform  
57 datasets [4, 20, 29, 34]. Therefore, there is a great need for automatic cell identification  
58 method that be used across studies, single cell platforms, and cancer types.

59 While there are many different single cell RNA-sequencing platforms whose results  
60 are on different scales and not directly comparable, the underlying gene to gene  
61 relationships should be consistent and navigating these relationships may allow for  
62 borrowing of information from different technologies. Deep learning brings us the  
63 possibility to explore and summarize complex highly non-linear relationships into  
64 high-level features from high throughput data sources. Deep learning is a powerful  
65 machine learning technique that is often used in visual recognition [12, 14], natural  
66 language processing [21, 32], and starting to infiltrate the realm of cancer  
67 research [3, 5, 25]. Deep learning learns patterns in data by using neural networks with  
68 many layers of nodes which transform the output model of the nodes from the previous  
69 layer with non-linear functions. The coefficients output from each node are augmented  
70 using gradient descent in order to optimize the prediction error of the network.

71 Wide and deep learning (WDL) combines a deep neural network with a generalized  
72 linear model (GLM) based on a small set of features. Deep learning tends to generalize  
73 patterns in the data, while in contrast GLMs may only memorize the patterns in the  
74 data. WDL has been shown to be an effective tool in recommender systems [6].  
75 Specifically, we propose utilizing a deep learning model which can leverage large  
76 dimensional data (deep), as well as, incorporate a few known biologically relevant genes  
77 in the last hidden layer of a neural network to emphasize their biological importance  
78 (wide). The wide part of the model allows us make cell type classification more precise  
79 and fine tuned to classify more specific immune cell sub-types such as distinguishing  
80 activated from exhausted CD8 T cells.

81 This paper serves two purposes. First it provides some background information  
82 about deep learning specifically focusing on regularization methods to avoid overfitting  
83 the model. Models are trained, validated, and subsequently used to classify cells from  
84 the same dataset. This scenario is realistic since it is possible that some hospitals may  
85 not have the resources needed for generating large amounts of data to build their own  
86 model. In addition, in many clinical studies the patients' tumor samples are collected  
87 over a fairly long period of time (years) in several batches. Waiting till sample collection  
88 is finished before single cell RNA-sequencing data analysis is not realistic. It will be  
89 extremely helpful to train a deep learning model using samples collected at earlier time  
90 points and subsequently apply it to later samples. Second, this paper provides an  
91 illustration of how incorporating known biologically relevant biomarkers can be used to  
92 transfer knowledge. In this scenario, we explore the possibility to transfer cell type  
93 annotations across different single cell RNA-sequencing platforms, which can help make  
94 full use of the enormous publicly available single cell RNA-seq data that are generated  
95 by different technologies.

96 In the methods section, we will describe the data single cell RNA-seq datasets used  
97 in study, provide background about deep learning, and wide and deep learning. Then in  
98 the results section, we will present results from training and testing the models in the  
99 two scenarios. Finally, we make some concluding comments and discussion in the  
100 discussion section.

## 101 2 Methods

### 102 2.1 Chang Data

103 Chang et al. [31] conducted droplet-based 10X 5' single-cell RNA-sequencing on 79,046  
104 cells from primary tumors of 11 patients with advanced basal cell carcinoma before and  
105 after anti-PD-1 treatment. In total, RNA profiles from 53,030 malignant, immune and  
106 stromal cells, and 33,106 T cells were obtained from single cell RNA-sequencing. The  
107 cell types of interest were T cells, B cells, nature killer (NK) cells, macrophages, cancer  
108 associated fibroblasts (CAFs), endothelial cells, plasma cells, melanocytes, and tumor  
109 cells. The T cells were further classified into regulatory (Tregs), follicular helpers (T<sub>FH</sub>),  
110 T helper 17 (T<sub>H</sub>17), naive T cells, activated CD8, exhausted CD8, effector CD8, and  
111 memory CD8 T cells (Supplementary Figure 1).

### 112 2.2 Tirosh data

113 Tirosh et al. [26] applied SMART-seq to 4645 single cells isolated from 19 freshly  
114 procured human melanoma tumors, profiling T cells, B cells, NK cells, macrophages,  
115 endothelial cells, CAFs, and melanoma cells. To further analyze the T cell sub-types, we  
116 downloaded the log-transformed TPM (Transcripts per Million reads) gene expression  
117 values provided by the study and imported them to Seurat [23]. S and G2/M cell cycle  
118 phase scores were assigned to cells based on previously defined gene sets [27] using  
119 CellCycleScoring function. Scaled z-scores for each gene were calculated using  
120 ScaleData function by regressing the S and G2/M phases scores. Shared nearest  
121 neighbor (SNN) based clustering method was used to identify clusters based on the first  
122 30 principle components computed from scaled data with resolution = 1. UMAPs were  
123 generated using the same principle components with perplexity = 30 and used for all  
124 visualization. Clusters were annotated by identifying differentially expressed marker  
125 genes for each cluster and comparing to known cell type markers and markers reported  
126 by Tirosh et al. From this analysis, we confirmed the cell annotation provided by Tirosh  
127 et al., and were able to further identify CD4+ T cells and CD8+ T cells.

## 128 2.3 Background for Classification Problems with Deep 129 Learning

Deep neural networks (DNN) are able to learn and condense highly non-linear features (genes) into a high level summary through the use of composition of functions. These functions are dot products that undergo a non-linear transformation and are then passed into another function in the next layer. There are three types of layers in a DNN which are input, hidden, and output layers. Each node in the input layer corresponds to the expression of a single gene. Information from the input layer is passed to each node in the a hidden layer which optimizes the weights in a dot product to maximize the cell type classification accuracy. The nodes in the output layer produce the probability that a cell is classified as a specific type. The architecture of a generic DNN with two hidden layers is seen in Figure 1. For multi-class classification the objective function to be minimized is so called cross-entropy function,  $H(P, Q)$ ,

$$\frac{1}{n} \sum_{i=1}^n H(P, Q) = -\frac{1}{n} \sum_{i=1}^m \sum_{j=1}^m P(x_i = j) \log(Q(x_i = j)), \quad (1)$$

130 where  $m$  is the number of cell types,  $n$  is the sample size,  $P$  is the target probability  
131 distribution and  $Q$  is the predicted cell type probability distribution. This function is  
132 minimized by gradient descent which is computed by iterating the chain rule over all  
133 layers of the model. The architecture of a DNN is complex and requires careful tuning.  
134 Some examples of tuning parameters in a DNN are number of samples used for  
135 stochastic gradient, iterations to train the model, and nodes in each layer [9, 10].

136 A challenge to training a deep learning model is to ensure that the results can be  
137 generalized to new data sets. One of the simplest ways to prevent overfitting is use to  
138 reduce the number of hidden layers or nodes which in turn decreases the number of  
139 parameters estimated by the model. Another technique is dropout which randomly  
140 deletes a specified proportion of nodes from each layer in the neural network. By  
141 deleting different sets nodes in each iteration the model is trained on different  
142 sub-networks and becomes less sensitive to the specific weights of nodes. Dropout can  
143 speed up the training of a DNN, however, it may require more iterations to train the  
144 network. It is recommended that the percentage of nodes to delete from each layer  
145 should be between 20-50% [22] Lastly, constraints can be imposed on the weight vector  
146 of each node requiring the norm be small. The regularizers work in a similar way to  
147 lasso or ridge penalization in a regression setting where there is an additional parameter  
148 which changes the influence of the penalization term. The aim is either to keep the  
149 value of the weights small or push as many as possible to zero (lasso). Elastic net  
150 penalization has also been used which allows for a balance between the  $\ell_1$  (lasso) and  $\ell_2$   
151 (ridge) penalty [9, 30, 33].

Understanding which genes were influential to a successful cell type classification model is important for validating the results and can lead to detection of novel genes for future research. Despite many machine learning techniques being seen as ‘black boxes’, there have been efforts to interpret the results. One simple approach to evaluate the importance of a feature is to calculate dot product of consecutive nodes [8]. This was originally proposed for neural networks with a single hidden layer, but we extend this work to a neural work with two hidden layers

$$w_i = H^{(1)} H^{(2)} O = \sum_{i=i}^{h_1} \sum_{j=i}^{h_2} \sum_{k=1}^m H_{ij}^{(1)} H_{jk}^{(2)} O_k \quad (2)$$

152 where  $H_{ij}^{(a)}$  is the coefficient passed from the  $i^{th}$  node of the  $(a-1)^{st}$  hidden layer to  
153 the  $j^{th}$  node in the  $a^{th}$  hidden layer, and  $O_k$  probability that a cell is from the  $k^{th}$  cell

|                    | Validation Accuracy | First Layer | Second Layer | Testing Accuracy |
|--------------------|---------------------|-------------|--------------|------------------|
| No Dropout         | 94.4                | 100         | 50           | 95.2             |
| Dropout Only       | 94.2                | 100         | 75           | 94.5             |
| Dropout + $\ell_2$ | 94.3                | 100         | 75           | 93.8             |
| Dropout + $\ell_1$ | 92.9                | 75          | 100          | 92.2             |

**Table 1.** Summary of the parameter selection, validation, and testing accuracy for the naive, and wide and deep learning models. The architecture was selected based on the model that highest accuracy when classifying cells in the validation data set. The testing accuracies arise from training a model with the specified architecture with training + validation datasets and testing on previously unused test set.

154 type. By ranking these weights of each gene we can gain some notion of variable  
155 importance in the final classification.

## 156 2.4 Emphasizing Important Genes for Improved Cell Type 157 Classifiers

158 Wide and deep learning (WDL) involves merging a set of features, wide component,  
159 with the last hidden layer in a DNN, deep component. Adding these features in the final  
160 step will ensure that they are emphasized in the model, since they may be lost due to  
161 dropout or assigned with small weights. The wide component is a generalized linear  
162 model where the input is a set original features. Wide components tend to memorize  
163 the patterns the data, while deep components can generalize non-linear patterns. The  
164 architecture of a WDL model is shown in Figure 1. In this study, specific genes that are  
165 exclusively expressed by a particular cell type are added to the last hidden layer forcing  
166 the model to emphasize them more. This may allow a DNN to produce a more accurate  
167 classify cells model than a model constructed with only a deep part, especially in  
168 scenarios where the data are obtained from different platforms or cancer types.

## 169 3 Results

### 170 3.1 Neural Network Tuning

171 In this section, we want to describe how the hyperparameters (number of nodes,  
172 regularization, dropout) were selected. Traditional deep learning models with two  
173 hidden layers were constructed with no regularization (No Dropout), 20% dropout for  
174 both hidden layers (Dropout Only), 20% dropout and an  $\ell_1$  regularizer for both hidden  
175 layers (Dropout +  $\ell_1$ ), and lastly 20% dropout and an  $\ell_2$  regularizer for both hidden  
176 layers (Dropout +  $\ell_2$ ). A grid search was employed where the first hidden layer could  
177 have 1, 5, 10, 25, 50, 75, 100, 500, 1000 nodes and the second hidden layer could have 1,  
178 5, 10, 25, 50, 75, 100, 500 nodes.

179 Figure 2 shows the training and validation accuracy (left) and loss (right) when  
180 there was the same architecture for each model, and a numerical summary is provided  
181 in Table 1 for the architecture leading to the best validation accuracy. Notice that with  
182 No Dropout, Dropout Only, and Dropout +  $\ell_1$  the validation loss increases as the model  
183 is trained. On the other hand, the validation accuracy and validation loss remains  
184 consistent with the training loss as epochs increase for Dropout +  $\ell_2$ , suggesting that  
185 even if the model is trained with an excessive number of iterations that the model  
186 performance will not suffer heavily from overtraining. While the No Dropout and  
187 Dropout only models had the lowest validation loss and nearly 100% training accuracy,

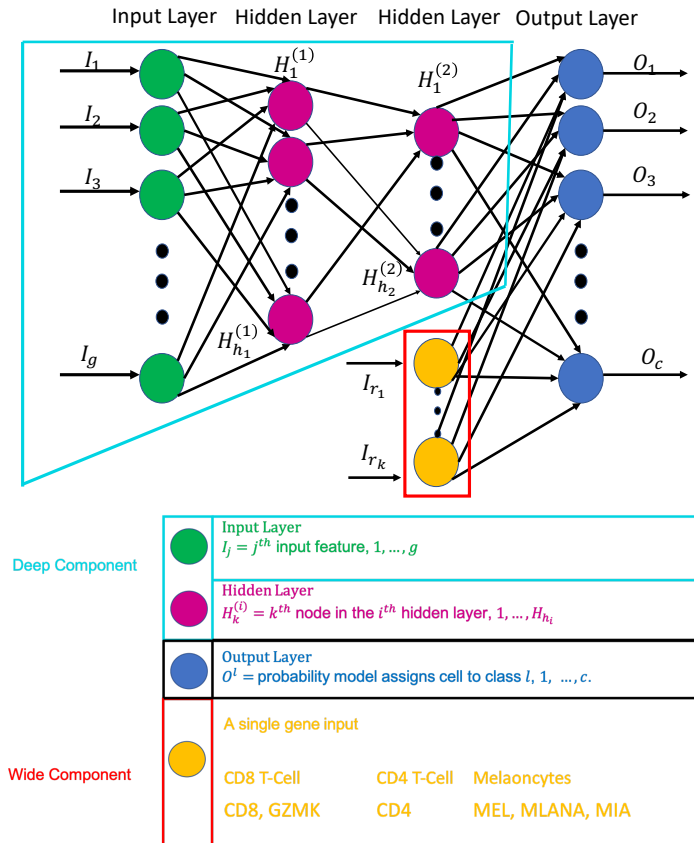

**Figure 1.** Depiction of a generic wide and deep learning neural network where the wide component is surrounded by the red lines and the deep component is encompassed by the turquoise lines. The deep component equivalent a traditional deep learning model described in sections 2.2 and 3.1. The gene names in yellow correspond to the genes that are used in the wide part of the WDL model in section 3.2.

188 they are undoubtedly overtrained and will likely not generalize well for future data.  
 189 Based on these finding, all models discussed in the remainder of this paper will be  
 190 constructed with dropout and  $\ell_2$  regularization especially since there is not a significant  
 191 difference between the testing accuracies of the four methods.

192 The overall accuracy of the Dropout +  $\ell_2$  model is 93.8%, with the prediction  
 193 accuracy of individual cell types ranging from 83 to 100% (Figure 3A). T-cell sub-types  
 194 are similar in gene expression profiles and are difficult to distinguish. T-cell sub-type  
 195 classification is commonly done as a second stage of classification where only the T-cells  
 196 are considered [31]. Figure 3A shows that using a deep learning framework, each T-cell  
 197 sub-type is classified with at least 83% accuracy, and 5 out of the 7 T-cell sub-types had  
 198 greater than 91% percent accuracy, and the misclassified cells were classified as another  
 199 type of T-cell. In single cell RNA-sequencing, the separation between activated CD8  
 200 and exhausted CD8 T cells are particularly difficult. The exhausted cells are considered  
 201 as chronically activated and they also highly express the activation markers such as  
 202 TNF and IFNG. The subtle difference between activated and exhausted CD8 T cells is  
 203 the overexpression of exhaustion markers such as TIGIT and HAVCR2. Our deep

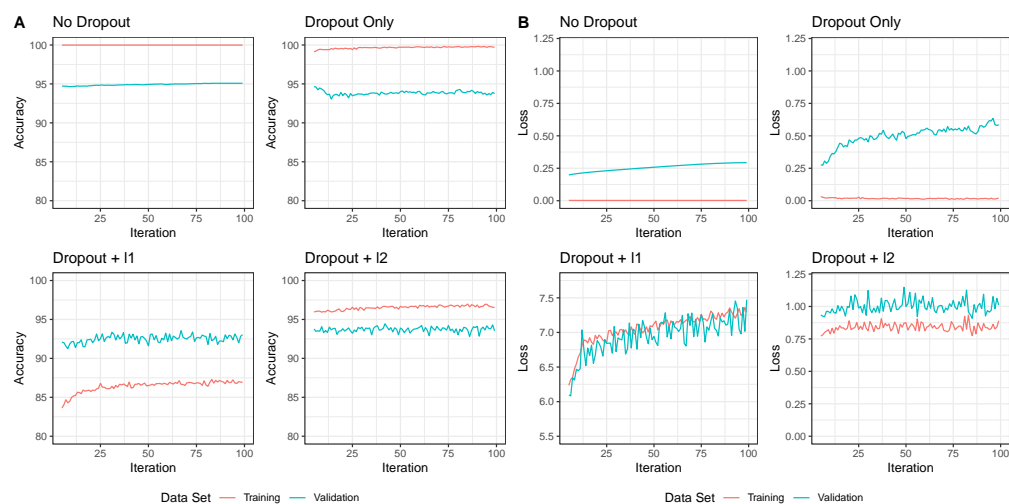

**Figure 2.** Comparison of the accuracy (A) and categorical cross-entropy loss (B) of four models from section 3.1 with varying methods of regularization and drop out. The plots are for iteration number 5 through 100. The red and turquoise lines correspond to the performance on the training validation set, respectively.

204 learning model with Dropout+  $\ell_2$  setting was able to capture these genes and ranked  
 205 their importance as 4<sup>th</sup> and 75<sup>th</sup> in total of 22,890 genes (Figure 3B, Supplementary  
 206 Table 1). In addition, the model also put high emphasis on the genes that are typically  
 207 over-expressed in tissue-resident memory cells, such as LAYN and CXCL13 (Figure 3A),  
 208 which is consistent with Chang et al. original findings. The cell type classification  
 209 accuracies for No Dropout, Dropout only, and Dropout +  $\ell_1$  are included in  
 210 Supplementary Figure 2.

### 211 3.2 Testing on Different Datasets

212 Both naive and WDL learning models were constructed using the melanoma data  
 213 generated by Chang for training and basal cell carcinoma data produced by Tirosh for  
 214 testing the models. Both models were constructed with 100 and 75 nodes for the first  
 215 and second layers respectively. A comparison of the true cells types and the predicted  
 216 cell types from the WDL model are shown in Figure 4A and 4B. The naive model had  
 217 an overall accuracy of 41% which is partly due to the model not classifying any cells as  
 218 CD4 T cells (Figure 4C). Another discrepancy is that a majority of melanoma cells were  
 219 classified as CAFs (62%), but the silver lining is that the naive model can distinguish  
 220 tumoral from stromal cells. A large percentage of NK cells were also classified as CD8-T  
 221 cells (45%) which is not surprising based on the similarity in cellular function and  
 222 location in the UMAP in Supplementary Figure 1.

223 With the addition of the 8 markers listed in Figure 1, the WDL model can better  
 224 discriminate sub-types of T cells, CD8 T cells and CD4 T cells, with an accuracy of 95.8  
 225 and 75.6% respectively (Figure 4B right) and obtained an overall accuracy of 90.1%  
 226 accuracy (Supplementary Figure 3). The classification accuracy by cell type ranges from  
 227 48.6% for NK Cells to 95.8% for CD8 T-cells with 6 of the 8 cell types having greater  
 228 than 87% accuracy (Figure 4B right). A majority of the misclassified CD8 T-cells were  
 229 classified classified within the same major cell type. Classification of melanoma cells  
 230 saw the largest increase in accuracy from 31% to 98%.

231 In order to understand why the models perform differently, we focus on the  
 232 differences between specific markers that were highly influential in each model. The

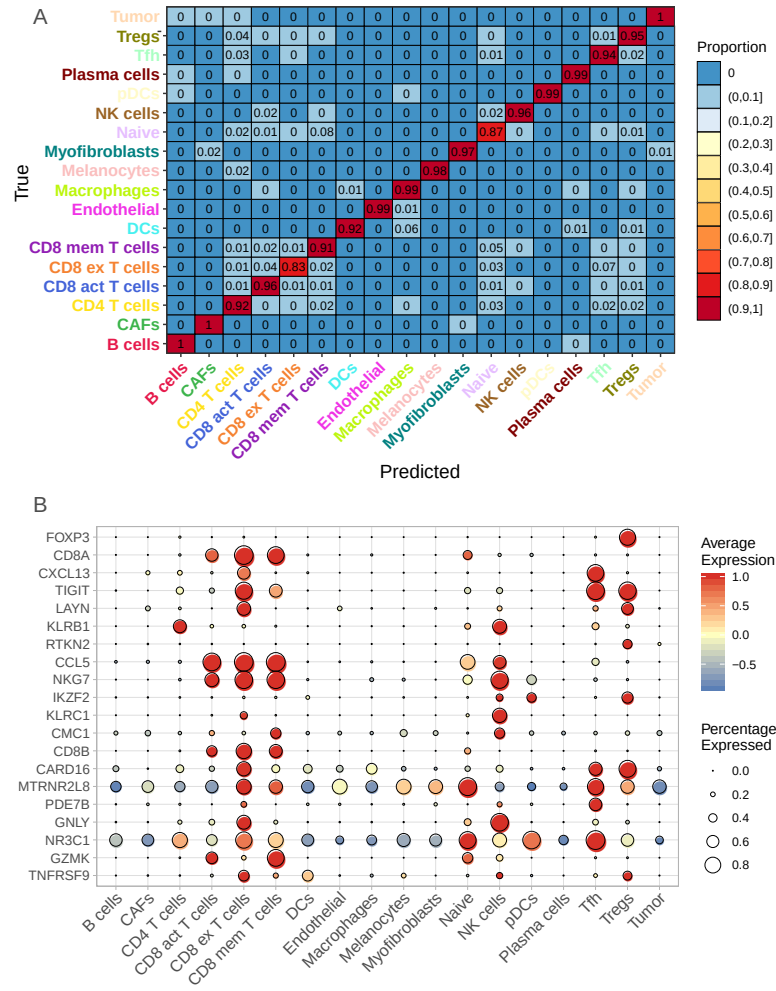

**Figure 3.** Heatmap of accuracies by cell type for a deep learning model (A), trained and tested on the Chang dataset, with two hidden layers with 100 and 75 nodes respectively, and 20% dropout and  $\ell_2$  regularization. Average expression of the top 20 most influential genes by cell type (B) where the size of the dot corresponds to the proportion of cells that express this gene and color ranging from blue to red indicating low to high average expression.

233 importance of the top 20 markers and their importance are displayed in the average  
 234 expression profiles for the each cell type in Figures 5A and 5B. A total of 8 markers  
 235 were included in the wide part of the WDL model, and these have by far the largest  
 236 importance in the model, and four of these (CD8A, CD8B, GZMK, and IL7R) which  
 237 are all important for identifying CD8 or CD4 T-cell. Thus the importance of these  
 238 markers explains why the model was able to classify CD8-T cells with an accuracy of  
 239 61%. Five out of the top 12 most important markers from the deep component of the  
 240 WDL model were in the top 20 markers in the naive model with slightly larger weights  
 241 in the WDL model. Additionally, there were no melanoma markers in the top 20 most  
 242 influential genes in the naive model leading to many of the melanoma cells being labels  
 243 as CAFs. Figures 5, Supplementary Figure 4 and Supplementary Table 2 show that are



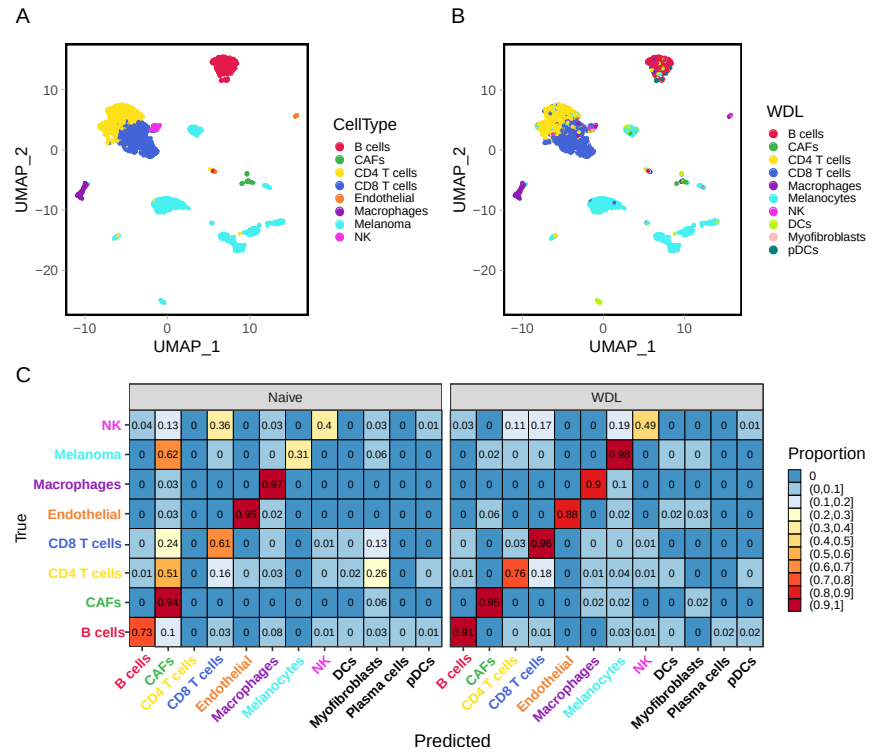

**Figure 4.** Comparison of the true cell types (A) and predicted cell types from a WDL model (B). Side-by-side comparison of the accuracy by cell type for the naive and WDL models (C).

244 several genes that are highly influential, yet are not expressed in many cells in the  
 245 training or test set, such as EOMES, SH2D1B, ENC1, VCAM1. This further illustrates  
 246 a challenge understanding the importance of markers only a small subset of cells in a  
 247 particular cell type may express these marker yet the model found them to be  
 248 influential. Chang identified, after restricting data to only T-cells, EOMES as a marker  
 249 to distinguish from CD4 memory T-cells other T-cell sub-types, while both deep  
 250 learning models were able to identify this as in important marker without subsetting the  
 251 data by major cell type (Supplementary Figure 4).

## 252 4 Discussion

253 WDL presents an opportunity to use a small set commonly known biological markers for  
 254 cell type classification to allow models to be slightly less data driven. We have  
 255 illustrated a substantial increase in overall accuracy (41 to 90%) and for T-cell  
 256 sub-types (CD4 increased from 0 to 76% and CD8 increased from 61 to 96%). We have  
 257 demonstrated that this can allow for training and testing of models from data obtained  
 258 from different platforms and types of skin cancer, and even when the target  
 259 classifications are not the same. Further refinement for classification of fine T-cell  
 260 sub-types is needed to address questions such as ‘how strong is the CD8 T-cell response  
 261 to a tumor?’, i.e. determine the proportion of CD8 T-cells that are exhausted, which are  
 262 very relevant in cancer research. Additionally, there is a great need to develop systems

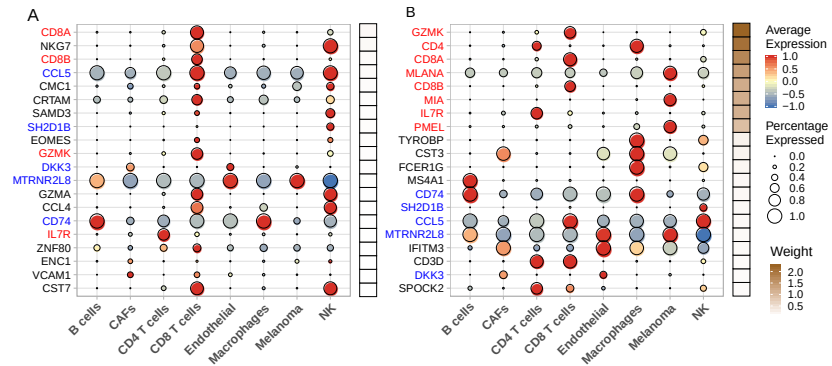

**Figure 5.** Dot plots for the Tirosh data using both naive (A) and WDL (B) with gene importance weights increasing with brown color scale. The genes names highlighted in red correspond to genes that were included in the wide part of the WDL model, and the blue gene names correspond to the genes that were not in the wide part yet were influential in both the naive and WDL models. Full list of genes and weights is included in Supplemental Table 2.

263 to transfer knowledge across cancer types. WDL allows the opportunity to address this  
 264 by including general set of genes for cell type classification and avoiding adding  
 265 data/cancer specific markers as shown in section 3.2.

266 In addition to adding a wide component to a DNN there is need for careful  
 267 consideration for how model is trained to avoid the memorization of data. While  
 268 dropout is a great tool for making deep learning models more generalizable there are  
 269 many applications where there is a need for additional steps to avoid overfitting.  
 270 Regularization is computationally intensive, but makes deep learning models for  
 271 generalizable to test datasets. Models can very easily be overtrained but a combination  
 272 of dropout and  $\ell_2$  regularization can provide a loss function that is stable across the  
 273 training iterations. Another challenge for deep learning in general is the randomness in  
 274 the initialization of node weights, dropout, and batches can lead to dramatically  
 275 different performances for models that are tuned in the same manner and data.  
 276 Studying an ensemble of deep neural networks could help study the stability of the  
 277 models and comparing the most important biomarkers in each model can provide  
 278 further confidence that the markers that are highly influential. Identifying these genes  
 279 can help clinicians understand commonality between immune cells behavior across  
 280 cancer types providing better insight and treatment of the cancers themselves.

## 281 Declarations

282 The authors declare that they have no known competing financial interests or personal  
 283 relationships that could have appeared to influence the work reported in this paper.

## 284 Funding

285 This work was supported in part by Institutional Research Grant number 14-189-19 (to  
 286 XW, XY) from the American Cancer Society, and a Department Pilot Project Award

287 from Moffitt Cancer Center (to XY). The funders had no role in study design, data  
288 collection and analysis, decision to publish, or preparation of the manuscript.

## 289 Authors' contributions

290 All authors read and approved the final manuscript. CW, BLF, JRC, XW, and XY  
291 conceived the study. CW, XW and XY designed the algorithm, performed the analyses,  
292 interpreted the results and wrote the manuscript.

## 293 Acknowledgments

294 The authors would like to thank Colleagues at Department of Biostatistics and  
295 Bioinformatics at Moffitt Cancer Center for providing feedback.

## References

1. T. Abdelaal, L. Michielsen, D. Cats, D. Hoogduin, H. Mei, M. J. T. Reinders, and A. Mahfouz. A comparison of automatic cell identification methods for single-cell rna sequencing data. *Genome Biology*, 20(1):194, 2019.
2. D. Aran, A. P. Looney, L. Liu, E. Wu, V. Fong, A. Hsu, S. Chak, R. P. Naikawadi, P. J. Wolters, A. R. Abate, A. J. Butte, and M. Bhattacharya. Reference-based analysis of lung single-cell sequencing reveals a transitional profibrotic macrophage. *Nature Immunology*, 20(2):163–172, 2019.
3. A. Cheerla and O. Gevaert. Deep learning with multimodal representation for pancancer prognosis prediction. *Bioinformatics*, 35(14):i446–i454, 07 2019.
4. G. Chen, B. Ning, and T. Shi. Single-cell rna-seq technologies and related computational data analysis. *Frontiers in Genetics*, 10:317, 2019.
5. H. Chen, O. Engkvist, Y. Wang, M. Olivecrona, and T. Blaschke. The rise of deep learning in drug discovery. *Drug Discovery Today*, 23(6):1241 – 1250, 2018.
6. H.-T. Cheng, M. Ispir, R. Anil, Z. Haque, L. Hong, V. Jain, X. Liu, H. Shah, L. Koc, J. Harmsen, and et al. Wide & deep learning for recommender systems. *Proceedings of the 1st Workshop on Deep Learning for Recommender Systems - DLRS 2016*, 2016.
7. J. K. de Kanter, P. Lijnzaad, T. Candelli, T. Margaritis, and F. C. P. Holstege. CHETAH: a selective, hierarchical cell type identification method for single-cell RNA sequencing. *Nucleic Acids Research*, 47(16):e95–e95, 06 2019.
8. G. D. Garson. Interpreting neural-network connection weights. 1991.
9. I. Goodfellow, Y. Bengio, and A. Courville. *Deep Learning*. The MIT Press, 2016.
10. A. Gulli and S. Pal. *Deep learning with Keras*. Packt Publishing Ltd, 2017.
11. T. Hashimshony, F. Wagner, N. Sher, and I. Yanai. Cel-seq: single-cell rna-seq by multiplexed linear amplification. *Cell Reports*, 2(3):666–673, September 2012.
12. M. T. Islam, B. M. N. Karim Siddique, S. Rahman, and T. Jabid. Image recognition with deep learning. In *2018 International Conference on Intelligent Informatics and Biomedical Sciences (ICIIBMS)*, volume 3, pages 106–110, 2018.

13. S. Islam, A. Zeisel, S. Joost, G. La Manno, P. Zajac, M. Kasper, P. Lönnerberg, and S. Linnarsson. Quantitative single-cell rna-seq with unique molecular identifiers. *Nature methods*, 11(2):163–166, February 2014.
14. X. Jia. Image recognition method based on deep learning. In *2017 29th Chinese Control And Decision Conference (CCDC)*, pages 4730–4735, 2017.
15. E. Z. Macosko, A. Basu, R. Satija, J. Nemesh, K. Shekhar, M. Goldman, I. Tirosh, A. R. Bialas, N. Kamitaki, E. M. Martersteck, J. J. Trombetta, D. A. Weitz, J. R. Sanes, A. K. Shalek, A. Regev, and S. A. McCarroll. Highly parallel genome-wide expression profiling of individual cells using nanoliter droplets. *Cell*, 161(5):1202–1214, May 2015.
16. L. McInnes, J. Healy, and J. Melville. Umap: Uniform manifold approximation and projection for dimension reduction, 2018. cite arxiv:1802.03426Comment: Reference implementation available at <http://github.com/lmcinnes/umap>.
17. A. Newman, C. Liu, M. Green, A. Gentles, W. Feng, Y. Xu, C. Hoang, M. Diehn, and A. Alizadeh. Robust enumeration of cell subsets from tissue expression profiles. *PLoS Medicine*, 12(5):453–457, Apr. 2015.
18. S. Picelli, r. K. Björklund, O. R. Faridani, S. Sagasser, G. Winberg, and R. Sandberg. Smart-seq2 for sensitive full-length transcriptome profiling in single cells. *Nature methods*, 10(11):1096–1098, November 2013.
19. S. Picelli, O. R. Faridani, A. K. Björklund, G. Winberg, S. Sagasser, and R. Sandberg. Full-length rna-seq from single cells using smart-seq2. *Nature protocols*, 9(1):171–181, January 2014.
20. P. See, J. Lum, J. Chen, and F. Ginhoux. A single-cell sequencing guide for immunologists. *Frontiers in Immunology*, 9:2425, 2018.
21. A. R. Sharma and P. Kaushik. Literature survey of statistical, deep and reinforcement learning in natural language processing. In *2017 International Conference on Computing, Communication and Automation (ICCCA)*, pages 350–354, 2017.
22. N. Srivastava, G. Hinton, A. Krizhevsky, I. Sutskever, and R. Salakhutdinov. Dropout: A simple way to prevent neural networks from overfitting. *Journal of Machine Learning Research*, 15(56):1929–1958, 2014.
23. T. Stuart, A. Butler, P. Hoffman, C. Hafemeister, E. Papalexi, W. M. Mauck, Y. Hao, M. Stoeckius, P. Smibert, and R. Satija. Comprehensive integration of single-cell data. *Cell*, 177(7):1888–1902.e21, June 2019.
24. G. Sturm, F. Finotello, F. Petitprez, J. D. Zhang, J. Baumbach, W. H. Fridman, M. List, and T. Aneichyk. Comprehensive evaluation of transcriptome-based cell-type quantification methods for immuno-oncology. *Bioinformatics*, 35(14):i436–i445, 07 2019.
25. B. Tang, Z. Pan, K. Yin, and A. Khateeb. Recent advances of deep learning in bioinformatics and computational biology. *Frontiers in Genetics*, 10:214, 2019.
26. I. Tirosh, B. Izar, S. M. Prakadan, M. H. Wadsworth, D. Treacy, J. J. Trombetta, A. Rothenberg, C. Rodman, C. Lian, G. Murphy, M. Fallahi-Sichani, K. Dutton-Regester, J.-R. Lin, O. Cohen, P. Shah, D. Lu, A. S. Genshaft, T. K. Hughes, C. G. K. Ziegler, S. W. Kazer, A. Gaillard, K. E. Kolb, A.-C. Villani,

- C. M. Johannessen, A. Y. Andreev, E. M. Van Allen, M. Bertagnolli, P. K. Sorger, R. J. Sullivan, K. T. Flaherty, D. T. Frederick, J. Jané-Valbuena, C. H. Yoon, O. Rozenblatt-Rosen, A. K. Shalek, A. Regev, and L. A. Garraway. Dissecting the multicellular ecosystem of metastatic melanoma by single-cell rna-seq. *Science*, 352(6282):189–196, 2016.
27. I. Tirosh, B. Izar, S. M. Prakadan, M. H. Wadsworth, D. Treacy, J. J. Trombetta, A. Rotem, C. Rodman, C. Lian, G. Murphy, M. Fallahi-Sichani, K. Dutton-Regester, J. R. Lin, O. Cohen, P. Shah, D. Lu, A. S. Genshaft, T. K. Hughes, C. G. Ziegler, S. W. Kazer, A. Gaillard, K. E. Kolb, A. C. Villani, C. M. Johannessen, A. Y. Andreev, E. M. Van Allen, M. Bertagnolli, P. K. Sorger, R. J. Sullivan, K. T. Flaherty, D. T. Frederick, J. Jané-Valbuena, C. H. Yoon, O. Rozenblatt-Rosen, A. K. Shalek, A. Regev, and L. A. Garraway. Dissecting the multicellular ecosystem of metastatic melanoma by single-cell RNA-seq. *Science*, 352(6282):189–196, Apr 2016.
28. L. van der Maaten and G. Hinton. Visualizing data using t-SNE. *Journal of Machine Learning Research*, 9:2579–2605, 2008.
29. B. Vieth, S. Parekh, C. Ziegenhain, W. Enard, and I. Hellmann. A systematic evaluation of single cell rna-seq analysis pipelines. *Nature Communications*, 10(1):4667, 2019.
30. C. Wu, M. J. F. Gales, A. Ragni, P. Karanasou, and K. C. Sim. Improving interpretability and regularization in deep learning. *IEEE/ACM Transactions on Audio, Speech, and Language Processing*, 26(2):256–265, 2018.
31. K. E. Yost, A. T. Satpathy, D. K. Wells, Y. Qi, C. Wang, R. Kageyama, K. L. McNamara, J. M. Granja, K. Y. Sarin, R. A. Brown, R. K. Gupta, C. Curtis, S. L. Bucktrout, M. M. Davis, A. L. S. Chang, and H. Y. Chang. Clonal replacement of tumor-specific t cells following pd-1 blockade. *Nature Medicine*, 25(8):1251–1259, 2019.
32. T. Young, D. Hazarika, S. Poria, and E. Cambria. Recent trends in deep learning based natural language processing [review article]. *IEEE Computational Intelligence Magazine*, 13(3):55–75, 2018.
33. K. Yu, W. Xu, and Y. Gong. Deep learning with kernel regularization for visual recognition. In D. Koller, D. Schuurmans, Y. Bengio, and L. Bottou, editors, *Advances in Neural Information Processing Systems 21*, pages 1889–1896. Curran Associates, Inc., 2009.
34. X. Zhang, T. Li, F. Liu, Y. Chen, J. Yao, Z. Li, Y. Huang, and J. Wang. Comparative analysis of droplet-based ultra-high-throughput single-cell rna-seq systems. *Molecular Cell*, 73(1):130 – 142.e5, 2019.
35. G. X. Y. Zheng, J. M. Terry, P. Belgrader, P. Ryvkin, Z. W. Bent, R. Wilson, S. B. Ziraldo, T. D. Wheeler, G. P. McDermott, J. Zhu, M. T. Gregory, J. Shuga, L. Montesclaros, J. G. Underwood, D. A. Masquelier, S. Y. Nishimura, M. Schnall-Levin, P. W. Wyatt, C. M. Hindson, R. Bharadwaj, A. Wong, K. D. Ness, L. W. Beppu, H. J. Deeg, C. McFarland, K. R. Loeb, W. J. Valente, N. G. Ericson, E. A. Stevens, J. P. Radich, T. S. Mikkelsen, B. J. Hindson, and J. H. Bielas. Massively parallel digital transcriptional profiling of single cells. *Nature communications*, 8:14049, January 2017.
